# Supplementary material
Source: publisher figshare collection journal article supplement (https://tandf.figshare.com/ndownloader/files/13549376)
Supplement: Supplementary file 1 [file 13549376]

| Compound | Constituent | Content |
| --- | --- | --- |
| LBPs a | Raw polysaccharides | Rha: Fuc: Ara: Xyl: Man: Gal: Glc: Uronic acid 0.47: 0.1: 8.84: 0.57: 0.22: 1.65: 1: 26.87 |
|
| Purified polysaccharides 1 | Rha: Ara: Xyl: Gal: Man: GalA 1:7.85: 0.37: 0.65: 3.01: 8.16 |
|
| Purified polysaccharides 2 | Rha: Ara: Xyl: Man: Glc: Gal: GalA 1: 8.34: 1.25: 1.26: 1.91: 7.05: 15.28 |
|
|  |  |  |
| LP b | Zeaxanthin dipalmitate c | 80.51% |
| Zeaxanthin | 0.10% |
| Zeaxanthin monopalmitate | 6.05% |
| β-Cryptoxanthin monopalmitate | 11.67% |
| β-carotene | 1.67% |

**Table S1.** The main components in LBPs and LP.

a The monosaccharide constituents of LBPs were cited from previous studies (Masci et al., 2018; Zou, Zhang, Yao, Niu, & Gao, 2010).

b The constituents of LP were cited from one previous study (Amagase, & Farnsworth, 2011).

c The contents of these compounds were the respective percentages in carotenoids that were suggested to be the major component in LP (Amagase, & Farnsworth, 2011).
